# Supplementary material
Source: MDPI journal article supplement (https://www.mdpi.com/1996-1073/13/3/570)
Supplement: s1 [file s1]

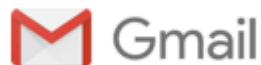

Chengcheng Tao &lt;chengchengtao@gmail.com&gt;

---

**Thank you for your order with RightsLink / Springer Nature**

1 message

---

**no-reply@copyright.com** <no-reply@copyright.com>  
To: chengchengtao@gmail.com

Tue, Jul 23, 2019 at 10:47 AM

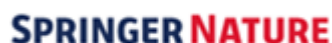**Thank you for your order!**

Dear Dr. Chengcheng Tao,

Thank you for placing your order through Copyright Clearance Center's RightsLink® service.

**Order Summary**

Licensee: National Energy Technology Laboratory  
Order Date: Jul 23, 2019  
Order Number: 4634821283891  
Publication: Frontiers of Structural and Civil Engineering  
Title: A critical review of preparation design and workability measurement of concrete material for largescale 3D printing  
Type of Use: Journal/Magazine  
Order Total: 0.00 USD

View or print complete [details](#) of your order and the publisher's terms and conditions.

Sincerely,

Copyright Clearance Center

Tel: +1-855-239-3415 / +1-978-646-2777  
[customercare@copyright.com](mailto:customercare@copyright.com)  
<https://myaccount.copyright.com>

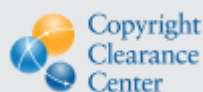

RightsLink®

This message (including attachments) is confidential, unless marked otherwise. It is intended for the addressee(s) only. If you are not an intended recipient, please delete it without further distribution and reply to the sender that you have

11/19/2019

Gmail - Thank you for your order with RightsLink / Springer Nature

received the message in error.
